# Supplementary material for: Bright bluish-green emitting Cu(i) complexes exhibiting efficient thermally activated delayed fluorescence
Source: Royal Society of Chemistry journal article supplement (doi:10.1039/d0dt04424e), 2021-01-01
Supplement: d0dt04424e1.pdf [file d0dt04424e1.pdf]

## Supporting Information for

# Bright bluish-green emitting Cu(I) complexes exhibiting efficient Thermally Activated Delayed Fluorescence

Chun-Hua Huang<sup>a,c</sup>, Mingxue Yang<sup>b,c</sup>, Xu-Lin Chen<sup>b,c</sup>, and Can-Zhong Lu<sup>a,b,c,d\*</sup>

<sup>a</sup> College of Materials Science and Engineering, Huaqiao University, Jimei Road 668, 361021 Xiamen, China

<sup>b</sup> CAS Key Laboratory of Design and Assembly of Functional Nanostructures, Fujian Provincial Key Laboratory of Nanomaterials, Fujian Institute of Research on the Structure of Matter, Chinese Academy of Sciences, Fuzhou, Fujian 350002, China

<sup>c</sup> Xiamen Institute of Rare Earth Materials, Fujian Institute of Research on the Structure of Matter, Chinese Academy of Sciences, Xiamen, Fujian 361021, China

<sup>d</sup> University of Chinese Academy of Sciences, Beijing 100049, China

\*Corresponding contributor. E-mail: [czlu@fjirsm.ac.cn](mailto:czlu@fjirsm.ac.cn) (C.-Z. Lu).

## S1. General Procedures

All commercially available starting materials were used without any purification. All reactions were performed under a nitrogen atmosphere. The crystal diffraction data were collected by single-crystal X-ray diffraction analysis with graphite monochromatized Mo  $K_{\alpha}$  radiation ( $\lambda=0.71073 \text{ \AA}$ ). The structures were obtained by direct methods and refined by full-matrix least squares methods using the SHELXL-97 program package.<sup>1</sup> The crystallographic data of three Cu(I) complexes have been deposited at the Cambridge Crystallographic Data Center. CCDC 2052750 (**1**), 2052752 (**2**) and 2052751 (**3**). Elemental analyses of C, H, and N were carried out with a Elementar Vario El Cube elemental analyzer. UV-Vis absorption spectra were obtained on a Perkin-Elmer lambda 900 UV-Vis spectrometer. Luminescence spectra were carried out on an Edinburgh Instrument F980 fluorescent spectrometer. The luminescence quantum yields were recorded on a Hamamatsu Photonics C11347-11 absolute photoluminescence quantum yield spectrometer.

## S2. Synthesis of Materials

The three diimine ligands were synthesized referring to the literature.<sup>2, 3</sup> The Cu(I) complexes were synthesized by mixing  $\text{Cu}(\text{CH}_3\text{CN})_4\text{BF}_4$  (0.1 mmol), POP ligand (0.1 mmol) and diimine ligands (0.1 mmol) in  $\text{CH}_2\text{Cl}_2$  at room temperature. After slow diffusion of diethyl ether vapor to the reaction mixture, granular crystals suitable for X-ray single-crystal diffraction measurement were obtained. The pure products of these Cu(I) complexes were obtained by recrystallizing from ether. All the diamine ligands and Cu(I) complexes were characterized by  $^1\text{H}$  NMR spectra on a Bruker Avance III 500 MHz NMR spectrometer.

**tBupzmpy**:  $^1\text{H}$  NMR (500 MHz, Chloroform- $d$ )  $\delta$  7.61 (t,  $J = 7.7 \text{ Hz}$ , 1H), 7.53 (d,  $J = 7.7 \text{ Hz}$ , 1H), 7.06 (d,  $J = 7.6 \text{ Hz}$ , 1H), 6.65 (s, 1H), 2.59 (s, 3H), 1.37 (s, 9H).

**Phpzmpy**:  $^1\text{H}$  NMR (500 MHz, Chloroform- $d$ )  $\delta$  7.86 (d,  $J = 7.2 \text{ Hz}$ , 2H), 7.65 (t,  $J = 7.7 \text{ Hz}$ , 1H), 7.52 (d,  $J = 7.7 \text{ Hz}$ , 1H), 7.44 (t,  $J = 7.6 \text{ Hz}$ , 2H), 7.34 (t,  $J = 7.4 \text{ Hz}$ , 1H), 7.11 (d,  $J = 7.7 \text{ Hz}$ , 1H), 7.03 (s, 1H), 2.61 (s, 3H).

**Adpzmpy**:  $^1\text{H}$  NMR (500 MHz, Chloroform- $d$ )  $\delta$  7.59 (t,  $J = 7.7 \text{ Hz}$ , 1H), 7.54 (d,  $J = 7.7 \text{ Hz}$ , 1H), 7.05 (d,  $J = 7.5 \text{ Hz}$ , 1H), 6.62 (s, 1H), 2.58 (s, 3H), 2.09 (s, 3H), 2.00 (s, 6H), 1.79 (s, 6H).

**Complex [Cu(tBupzmpy)(POP)]BF<sub>4</sub>**: (colorless crystal, yield: 58mg, 65%).  $^1\text{H}$  NMR (500 MHz, Methylene Chloride- $d_2$ )  $\delta$  10.06 (s, 1H), 7.84 (s, 1H), 7.65 (s, 1H), 7.16 (dd,  $J = 138.6, 38.1 \text{ Hz}$ , 27H), 6.75 (s, 2H), 6.52 (s, 1H), 2.29 (s, 3H), 1.84 (s, 9H).  $^{31}\text{P}$  NMR (202 MHz, Methylene Chloride- $d_2$ )  $\delta$  -12.54. Elemental analysis: calc for  $\text{C}_{49}\text{H}_{45}\text{BCuF}_4\text{N}_3\text{OP}_2$ : C, 65.08; H, 5.01; N, 4.69. Found: C, 67.3; H, 4.58; N, 4.63.

**Complex [Cu(Phpzmpy)(POP)]BF<sub>4</sub>**: (colorless crystal, yield: 72mg, 78%).  $^1\text{H}$  NMR (500 MHz, Methylene Chloride- $d_2$ )  $\delta$  10.91 (s, 1H), 7.87 (s, 1H), 7.74 (s, 1H), 7.46 (td,  $J = 16.4, 15.7, 7.4 \text{ Hz}$ , 6H), 7.40 – 7.12 (m, 19H), 7.01 (dd,  $J = 17.9, 10.4 \text{ Hz}$ , 8H), 6.76 (dtd,  $J = 7.9, 4.0, 1.6 \text{ Hz}$ , 2H), 2.19 (s, 3H).  $^{31}\text{P}$  NMR (202 MHz, Methylene Chloride- $d_2$ )  $\delta$  -13.27. Elemental analysis: calc for  $\text{C}_{51}\text{H}_{41}\text{BCuF}_4\text{N}_3\text{OP}_2$ : C, 66.28; H, 4.47; N, 4.80. Found: C, 67.29; H, 5.06; N, 4.80.

**Complex [Cu(Adpzmpy)(POP)]BF<sub>4</sub>**: (colorless crystal, yield: 83mg, 85%).  $^1\text{H}$  NMR (500 MHz, Methylene Chloride- $d_2$ )  $\delta$  9.96 (s, 1H), 7.83 (t,  $J = 7.8 \text{ Hz}$ , 1H), 7.66 (d,  $J = 7.7 \text{ Hz}$ , 1H), 7.40–7.29 (m, 8H), 7.23 (d,  $J = 9.3 \text{ Hz}$ , 9H), 7.14 (d,  $J = 7.7 \text{ Hz}$ , 1H), 7.12–6.98 (m, 12H), 6.75 (s, 2H), 6.51 (s, 1H), 2.29 (s, 3H), 2.06–2.01 (m, 3H), 1.83–1.70 (m, 12H).  $^{31}\text{P}$  NMR (202 MHz, Methylene Chloride- $d_2$ )  $\delta$  -13.08. Elemental analysis: calc for  $\text{C}_{55}\text{H}_{51}\text{BCuF}_4\text{N}_3\text{OP}_2$ : C, 67.24; H, 5.23; N, 4.48. Found: C, 67.29; H, 5.22; N, 4.48.

## S3. Crystal parameters and refinement data

Table S1 Crystal parameters and refinement data of complexes **1-3**

| Complex           | <b>1</b>                                                       | <b>2</b>                                                       | <b>3</b>                                                       |
|-------------------|----------------------------------------------------------------|----------------------------------------------------------------|----------------------------------------------------------------|
| Empirical formula | $\text{C}_{49}\text{H}_{45}\text{BCuF}_4\text{N}_3\text{OP}_2$ | $\text{C}_{51}\text{H}_{41}\text{BCuF}_4\text{N}_3\text{OP}_2$ | $\text{C}_{55}\text{H}_{51}\text{BCuF}_4\text{N}_3\text{OP}_2$ |
| Formula weight    | 904.18                                                         | 924.17                                                         | 982.29                                                         |
| Crystal system    | triclinic                                                      | monoclinic                                                     | triclinic                                                      |
| Space group       | P-1                                                            | P21                                                            | P-1                                                            |
| a/ $\text{\AA}$   | 9.824(4)                                                       | 9.673(4)                                                       | 10.105(4)                                                      |

|                                                                            |                    |                    |                    |
|----------------------------------------------------------------------------|--------------------|--------------------|--------------------|
| b/ Å                                                                       | 13.161(5)          | 16.603(5)          | 13.447(5)          |
| c/ Å                                                                       | 18.423(6)          | 14.007(6)          | 20.983(8)          |
| $\alpha$ /°                                                                | 96.354(2)          | 90                 | 89.808(1)          |
| $\beta$ /°                                                                 | 97.197(2)          | 97.6950(1)         | 77.186(1)          |
| $\gamma$ /°                                                                | 103.994(1)         | 90                 | 69.217(1)          |
| Volume/Å <sup>3</sup>                                                      | 2268.37(2)         | 2229.21(2)         | 2590.33(2)         |
| Z                                                                          | 2                  | 2                  | 2                  |
| $\rho$ calc/cm <sup>3</sup>                                                | 1.324              | 1.377              | 1.259              |
| F(000)                                                                     | 936                | 952                | 1020               |
| Crystal size/mm <sup>3</sup>                                               | 0.32 × 0.21 × 0.19 | 0.15 × 0.15 × 0.08 | 0.17 × 0.15 × 0.15 |
| 2 $\theta$ /°                                                              | 5.1 to 55.08       | 4.91 to 55.01      | 3.67 to 55.09      |
| h                                                                          | -12 ≤ h ≤ 12       | -12 ≤ h ≤ 12       | -13 ≤ h ≤ 13       |
| k                                                                          | -17 ≤ k ≤ 17       | -21 ≤ k ≤ 21       | -17 ≤ k ≤ 17       |
| l                                                                          | -23 ≤ l ≤ 23       | -18 ≤ l ≤ 17       | -27 ≤ l ≤ 27       |
| Reflections collected                                                      | 70868              | 65560              | 116767             |
| Independent reflections                                                    | 10382              | 10115              | 11899              |
| Data/restraints/parameters                                                 | 10382/0/554        | 10115/1/569        | 11899/0/605        |
| G.O.F                                                                      | 1.053              | 1.047              | 1.086              |
| R <sub>1</sub> ,wR <sub>2</sub> [I>=2 $\sigma$ (I)]                        | 0.0410, 0.1117     | 0.0393, 0.0876     | 0.0515, 0.1529     |
| R <sub>1</sub> ,wR <sub>2</sub> [all data]                                 | 0.0452, 0.1151     | 0.0466, 0.0936     | 0.0560, 0.1569     |
| $\Delta\rho_{\max}$ , $\Delta\rho_{\min}$ / e <sup>-</sup> Å <sup>-3</sup> | 0.55/-0.51         | 0.52/-0.41         | 1.69/-0.73         |

<sup>a</sup>R<sub>1</sub>= $\sum ||F_o| - |F_c|| / \sum |F_o|$ . <sup>b</sup>wR<sub>2</sub>=[ $\sum w(F_o^2 - F_c^2)^2 / \sum w(F_o^2)$ ]<sup>1/2</sup>

#### S4. Selected bond distances and angles

Table S2 Selected bond distances [Å] and angles [°] for complexes **1–3**

|                    | <b>1</b>  | <b>2</b>  | <b>3</b>  |
|--------------------|-----------|-----------|-----------|
| bond distances [Å] |           |           |           |
| Cu1-P1             | 2.280(5)  | 2.256(1)  | 2.274(6)  |
| Cu1-P2             | 2.269(5)  | 2.284(1)  | 2.271(7)  |
| Cu1-N1             | 2.127(2)  | 2.154(3)  | 2.101(2)  |
| Cu1-N2             | 2.078(1)  | 2.081(3)  | 2.084(2)  |
| angles [°]         |           |           |           |
| P1-Cu1-P2          | 115.07(2) | 112.39(4) | 114.52(2) |
| N1-Cu1-P1          | 109.14(4) | 120.65(9) | 112.04(6) |
| N1-Cu1-P2          | 116.52(4) | 108.60(9) | 114.93(6) |
| N2-Cu1-P1          | 114.71(4) | 117.14(1) | 117.89(6) |
| N2-Cu1-P2          | 116.90(4) | 114.81(1) | 113.09(6) |
| N2-Cu1-N1          | 79.44(6)  | 79.42(1)  | 79.88(8)  |

## S5. Cyclic voltammetry measurement

Cyclic voltammetry was performed on a BAS Epsilon Electrochemical Analyzer with a gastight single-compartment three-electrode cell. A glassy carbon disk and a platinum wire were used as working and auxiliary electrodes, respectively and the reference electrode was Ag/Ag<sup>+</sup> (0.1 M of AgNO<sub>3</sub> in CH<sub>2</sub>Cl<sub>2</sub>). The CV measurements were performed in anhydrous and nitrogen-saturated dichloromethane solutions with 0.05 M n-tetrabutylammonium perchlorate (TBAP) and 0.05 mM cuprous complexes. The ferrocenium/ferrocene couple was used as an internal standard.

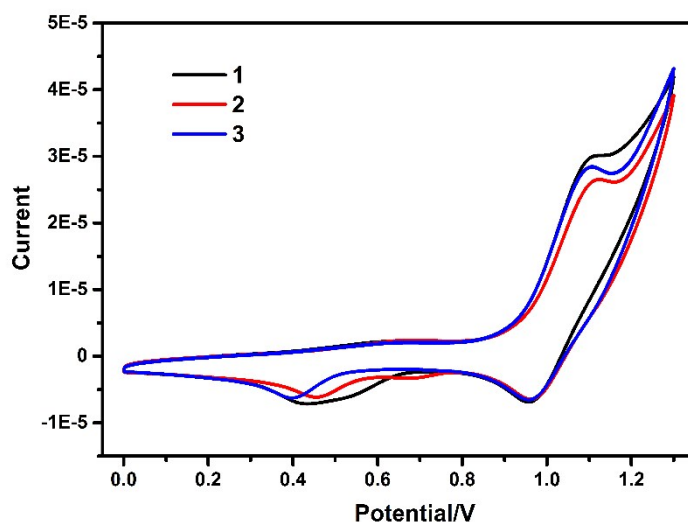

Figure S1 Cyclic voltammograms for the oxidation of complex **1**, **2** and **3**.

## S6. Computational Methodology and Results

All the calculations were carried out using the Gaussian 09 program package.<sup>4</sup> The density functional theory (DFT) calculations were used to optimize the ground state geometries of the investigated compounds.<sup>5</sup> A “double- $\zeta$ ” quality basis set consisting of Hay and Wadt’s effective core potentials (LANL2DZ) was employed for the C, N and H atoms, and a LANL08 basis set was employed for the Cu and P atoms. Time-dependent density functional theory (TD-DFT) calculations were performed at the PBE0 level using the optimized ground state geometries.<sup>6, 7</sup> The electron density diagrams of molecular orbitals were generated using Gauss View program. The partition orbital composition was analyzed by using the Multiwfn 2.4 program.<sup>8</sup>

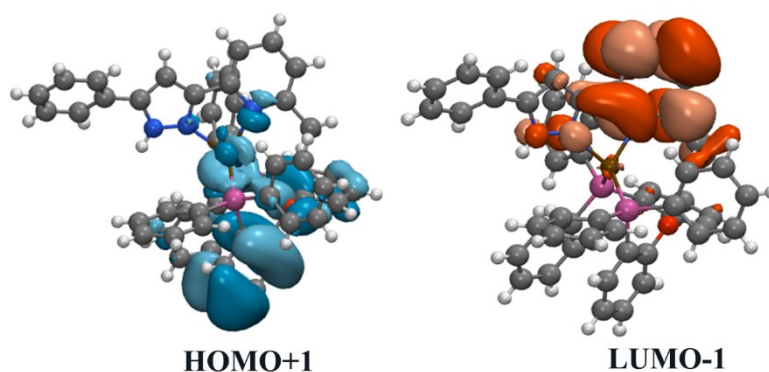

Figure S2 The HOMO+1(blue) and LUMO-1(orange) orbital distribution of complex **2**.

Table S3 The orbital composition of HOMO and LUMO orbitals for complexes **1–3**

| Complex  | Orbit | Cu     | POP    | NN     |
|----------|-------|--------|--------|--------|
| <b>1</b> | HOMO  | 30.51% | 63.36% | 6.13%  |
|          | LUMO  | 3.92%  | 5.71%  | 90.37% |
| <b>2</b> | HOMO  | 32.60% | 59.86% | 7.54%  |
|          | LUMO  | 3.67%  | 5.52%  | 90.80% |
| <b>3</b> | HOMO  | 30.67% | 62.36% | 6.97%  |
|          | LUMO  | 4.26%  | 5.94%  | 89.80% |

## S7. TGA curves

The TGA test were performed on a Mettler Telodo synchronous thermal analyser with a 10 °C/min heating rate at the flowing N<sub>2</sub> atmosphere. All of these samples prepared for experiment have been dried for 2 hours at 90°C.

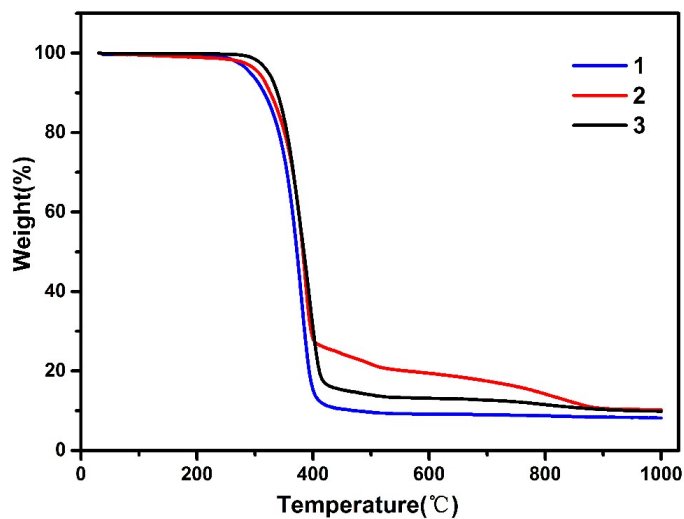

Figure S3 TGA curves of complex 1-3.

## S8. The dihedral angles $\theta$ between plane N1–Cu(1)–N2 and P1–Cu(1)–P2 of complexes 1 and 2 in different viewing directions

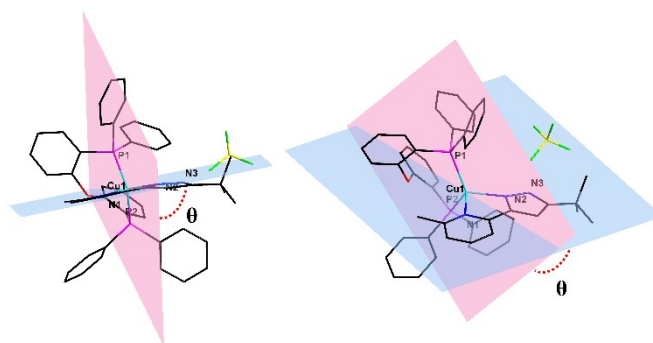

Figure S4 The dihedral angles  $\theta$  between plane N1–Cu(1)–N2 and P1–Cu(1)–P2 of complexes 1 in different viewing directions.

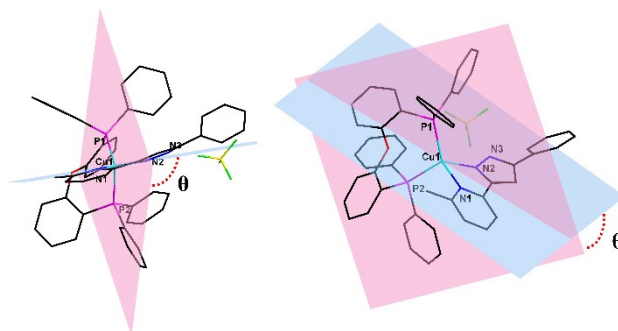

Figure S5 The dihedral angles  $\theta$  between plane N1–Cu(1)–N2 and P1–Cu(1)–P2 of complexes 2 in different viewing directions.

## S9. UV-vis spectra of ligands in degassed CH<sub>2</sub>Cl<sub>2</sub>

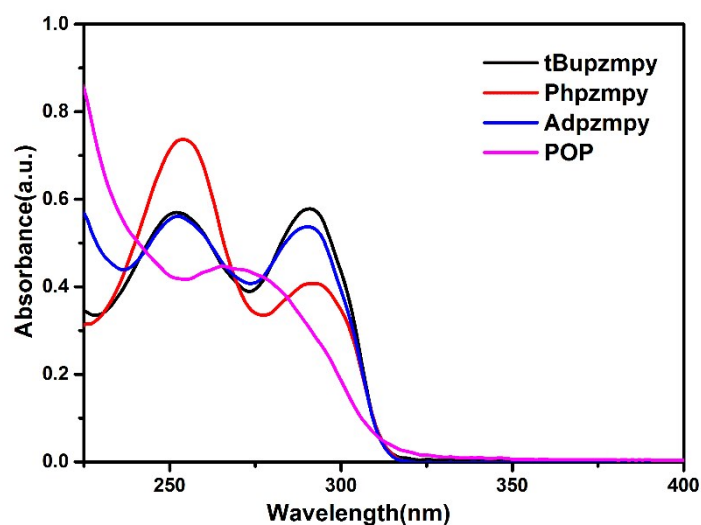

Figure S6 UV-vis spectra of ligands in degassed CH<sub>2</sub>Cl<sub>2</sub>.

## S10. Solid state UV-Vis absorption spectra of complexes 1-3

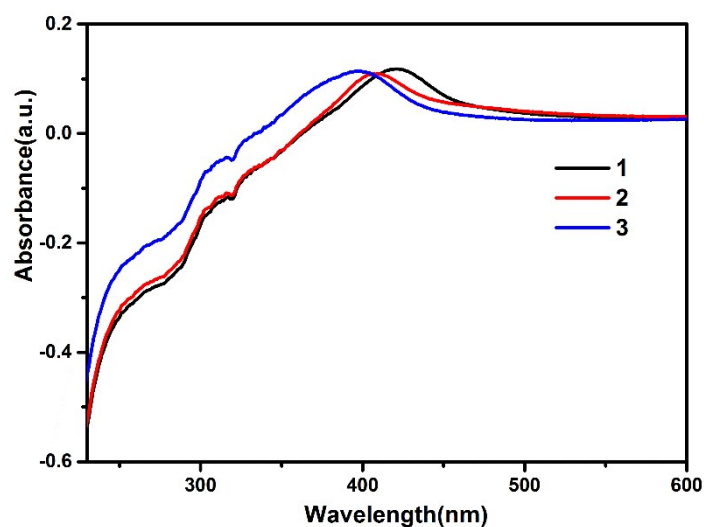

Figure S7 Solid state UV-Vis absorption spectra of complexes 1-3.

## Notes and references

1. G. M. Sheldrick, *SHELX-97, Program for the Solution and Refinement of Crystal Structures*, University of Göttingen, Göttingen, Germany, 1997.
2. S. Y. Ahn, H. S. Lee and Y. Ha, *J. Nanosci. Nanotechnol.*, 2011, **11**, 4414-4418.
3. B. Schowtka, H. Görls and M. Westerhausen, *Z. Anorg. Allg. Chem.*, 2014, **640**, 907-915.
4. M. J. Frisch, G. W. Trucks, H. B. Schlegel, G. E. Scuseria, M. A. Robb, J. R. Cheeseman, G. Scalmani, V. Barone, B. Mennucci, G. A. Petersson, H. Nakatsuji, M. Caricato, X. Li, H. P. Hratchian, A. F. Izmaylov, J. Bloino, G. Zheng, J. L. Sonnenberg, M. Hada, M. Ehara, K. Toyota, R. Fukuda, J. Hasegawa, M. Ishida, T. Nakajima, Y. Honda, O. Kitao, H. Nakai, T. Vreven, J. A. Montgomery, J. E. Peralta, F. Ogliaro, M. Bearpark, J. J. Heyd, E. Brothers, K. N. Kudin, V. N. Staroverov, R. Kobayashi, J. Normand, K. Raghavachari, A. Rendell, J. C. Burant, S. S. Iyengar, J. Tomasi, M. Cossi, N. Rega, J. M. Millam, M. Klene, J. E. Knox, J. B. Cross, V. Bakken, C. Adamo, J. Jaramillo, R. Gomperts, R. E.

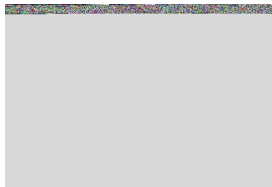

Stratmann, O. Yazyev, A. J. Austin, R. Cammi, C. Pomelli, J. W. Ochterski, R. L. Martin, K. Morokuma, V. G. Zakrzewski, G. A. Voth, P. Salvador, J. J. Dannenberg, S. Dapprich, A. D. Daniels, O. Farkas, J. B. Foresman, J. V. Ortiz, J. Cioslowski and D. J. Fox, *Gaussian 09, Revision D.01*, Gaussian Inc., Wallingford, CT, 2009..

5. C. Lee, W. Yang and R. G. Parr, *Phys.Rev.B*, 1988, **37**, 785-789.
6. M. E. Casida, C. Jamorski, K. C. Casida and D. R. Salahub, *J.Chem.Phys.*, 1998, **108**, 4439-4449.
7. R. E. Stratmann, G. E. Scuseria and M. J. Frisch, *J.Chem.Phys.*, 1998, **109**, 8218-8224.
8. T. Lu and F. Chen, *J. Comput. Chem.*, 2012, **33**, 580-592.
